# Supplementary material for: A Retrospective Study of the Clinical Burden of Hospitalized All-Cause and Pneumococcal Pneumonia in Canada
Source: Hindawi journal article supplement (doi:10.1155/2016/3605834), 2016-01-01
Supplement: f1 [file 3605834.f1.pdf]

**Table S1. ICD-10 CA Codes**

| <b>All-Cause Pneumonia and Pneumococcal Pneumonia</b> |                                                                                                                                                                                                                                                                                                                                                                                                                                                                                                                                                                   |
|-------------------------------------------------------|-------------------------------------------------------------------------------------------------------------------------------------------------------------------------------------------------------------------------------------------------------------------------------------------------------------------------------------------------------------------------------------------------------------------------------------------------------------------------------------------------------------------------------------------------------------------|
| J12.0–2, J12.8, J12.9                                 | Viral pneumonia, not elsewhere classified: J12.0 (Adenoviral pneumonia); J12.1 (Respiratory syncytial virus pneumonia); J12.2 (Parainfluenza virus pneumonia); J12.8 (Other viral pneumonia), J12.9 (Viral pneumonia unspecified)                                                                                                                                                                                                                                                                                                                                 |
| J13                                                   | Pneumonia due to <i>Streptococcus pneumoniae</i>                                                                                                                                                                                                                                                                                                                                                                                                                                                                                                                  |
| J14                                                   | Pneumonia due to <i>Haemophilus influenza</i>                                                                                                                                                                                                                                                                                                                                                                                                                                                                                                                     |
| J15.0–9                                               | Bacterial pneumonia, not elsewhere classified: J15.0 (Pneumonia due to <i>Klebsiella pneumoniae</i> ); J15.1 (Pneumonia due to <i>Pseudomonas</i> ); J15.2 (Pneumonia due to <i>Staphylococcus</i> ); J15.3 (Pneumonia due to <i>Streptococcus</i> , group B); J15.4 (Pneumonia due to other streptococci); J15.5 (Pneumonia due to <i>Escherichia coli</i> ); J15.6 (Pneumonia due to other aerobic Gram-negative bacteria); J15.7 (Pneumonia due to <i>Mycoplasma pneumoniae</i> ); J15.8 (Other bacterial pneumonia); J15.9 (Bacterial pneumonia, unspecified) |
| J16.0, J16.8                                          | Pneumonia due to other infectious organisms, not elsewhere classified: J16.0 ( <i>Chlamydia pneumoniae</i> ); J16.8 (Pneumonia due to other specified infectious organisms)                                                                                                                                                                                                                                                                                                                                                                                       |
| J17.0–3, J17.8                                        | Pneumonia in diseases classified elsewhere: J17.0 (Pneumonia in diseases classified elsewhere); J17.1 (Pneumonia in viral diseases classified elsewhere); J17.2 (Pneumonia in mycoses); J17.3 (Pneumonia in parasitic diseases); J17.8 (Pneumonia in other diseases classified elsewhere)                                                                                                                                                                                                                                                                         |
| J18.0–2, J18.8, J18.9                                 | Pneumonia, organism unspecified: J18.0 (Bronchopneumonia, unspecified); J18.1 (Lobar pneumonia, unspecified); J18.2 (Hypostatic pneumonia, unspecified); J18.8 (Other pneumonia, organism unspecified); J18.9 (Pneumonia, unspecified)                                                                                                                                                                                                                                                                                                                            |

ICD-10 CA, International Classification of Diseases, Tenth Revision (34).

**Table S2. Annual incidence and case-fatality rates for hospitalizations due to all-cause pneumonia in Canada, 2004–2005 to 2009–2010 by age group**

|                                                      | <b>2004–2005</b>     | <b>2005–2006</b>     | <b>2006–2007</b>     | <b>2007–2008</b>     | <b>2008–2009</b>     | <b>2009–2010</b>     |
|------------------------------------------------------|----------------------|----------------------|----------------------|----------------------|----------------------|----------------------|
| <b>Annual incidence per 100,000 persons (95% CI)</b> |                      |                      |                      |                      |                      |                      |
| 0–4 years                                            | 694<br>(680, 708)    | 659<br>(646, 673)    | 638<br>(625, 652)    | 536<br>(524, 548)    | 562<br>(550, 575)    | 611<br>(598, 624)    |
| 5–9 years                                            | 125<br>(119, 131)    | 151<br>(145, 158)    | 124<br>(118, 130)    | 114<br>(108, 119)    | 104<br>(99, 110)     | 154<br>(148, 161)    |
| 10–14 years                                          | 48<br>(45, 52)       | 53<br>(50, 57)       | 46<br>(43, 49)       | 43<br>(40, 46)       | 37<br>(34, 40)       | 53<br>(50, 57)       |
| 15–19 years                                          | 40<br>(37, 43)       | 42<br>(39, 45)       | 39<br>(36, 42)       | 37<br>(34, 40)       | 35<br>(33, 38)       | 42<br>(39, 46)       |
| 20–29 years                                          | 46<br>(44, 49)       | 45<br>(43, 47)       | 45<br>(43, 48)       | 44<br>(42, 46)       | 41<br>(39, 44)       | 46<br>(44, 48)       |
| 30–39 years                                          | 76<br>(73, 79)       | 75<br>(72, 78)       | 75<br>(73, 78)       | 77<br>(74, 80)       | 66<br>(63, 69)       | 75<br>(72, 78)       |
| 40–49 years                                          | 111<br>(108, 115)    | 112<br>(109, 116)    | 114<br>(111, 118)    | 119<br>(116, 122)    | 111<br>(108, 114)    | 123<br>(120, 127)    |
| 50–59 years                                          | 222<br>(216, 227)    | 216<br>(211, 221)    | 212<br>(207, 217)    | 213<br>(208, 218)    | 210<br>(205, 215)    | 226<br>(221, 231)    |
| 60–69 years                                          | 549<br>(539, 559)    | 530<br>(520, 540)    | 515<br>(505, 525)    | 495<br>(486, 504)    | 500<br>(491, 509)    | 501<br>(492, 510)    |
| 70–79 years                                          | 1405<br>(1386, 1425) | 1328<br>(1309, 1347) | 1303<br>(1284, 1321) | 1259<br>(1241, 1277) | 1275<br>(1257, 1293) | 1209<br>(1191, 1226) |
| ≥80 years                                            | 3527<br>(3487, 3567) | 3373<br>(3334, 3412) | 3264<br>(3227, 3302) | 3115<br>(3079, 3151) | 3152<br>(3117, 3188) | 3002<br>(2968, 3037) |

|                                  | 2004–2005            | 2005–2006            | 2006–2007            | 2007–2008            | 2008–2009            | 2009–2010            |
|----------------------------------|----------------------|----------------------|----------------------|----------------------|----------------------|----------------------|
| <b>Case-fatality, % (95% CI)</b> |                      |                      |                      |                      |                      |                      |
| 0–4 years                        | 0.2<br>(0.1, 0.3)    | 0.2<br>(0.1, 0.4)    | 0.2<br>(0.1, 0.4)    | 0.2<br>(0.2, 0.4)    | 0.3<br>(0.2, 0.5)    | 0.2<br>(0.1, 0.3)    |
| 5–9 years                        | 0.2<br>(0.1, 0.5)    | 0.3<br>(0.2, 0.7)    | 0.3<br>(0.1, 0.7)    | 0.3<br>(0.1, 0.7)    | 0.5<br>(0.2, 1.0)    | 0.4<br>(0.2, 0.8)    |
| 10–14 years                      | 1.1<br>(0.5, 2.2)    | 0.9<br>(0.5, 1.8)    | 0.7<br>(0.3, 1.6)    | 1.0<br>(0.5, 2.1)    | 1.2<br>(0.6, 2.5)    | 0.7<br>(0.3, 1.6)    |
| 15–19 years                      | 2.1<br>(1.2, 3.5)    | 2.0<br>(1.2, 3.3)    | 0.9<br>(0.4, 2.0)    | 2.2<br>(1.3, 3.6)    | 1.1<br>(0.5, 2.3)    | 2.0<br>(1.2, 3.3)    |
| 20–29 years                      | 2.1<br>(1.5, 2.9)    | 1.3<br>(0.8, 2.0)    | 1.9<br>(1.4, 2.8)    | 2.0<br>(1.4, 2.8)    | 2.7<br>(1.9, 3.6)    | 2.9<br>(2.2, 3.8)    |
| 30–39 years                      | 3.2<br>(2.6, 4.0)    | 2.6<br>(2.0, 3.3)    | 2.5<br>(1.9, 3.1)    | 1.9<br>(1.5, 2.5)    | 2.3<br>(1.8, 3.0)    | 2.3<br>(1.8, 2.9)    |
| 40–49 years                      | 5.3<br>(4.7, 6.0)    | 4.5<br>(3.9, 5.1)    | 4.3<br>(3.8, 4.9)    | 3.9<br>(3.4, 4.5)    | 4.3<br>(3.7, 4.9)    | 4.1<br>(3.6, 4.7)    |
| 50–59 years                      | 7.8<br>(7.2, 8.4)    | 7.1<br>(6.5, 7.7)    | 7.5<br>(6.9, 8.1)    | 7.2<br>(6.7, 7.9)    | 6.8<br>(6.2, 7.3)    | 6.4<br>(5.9, 7.0)    |
| 60–69 years                      | 10.4<br>(9.8, 11.0)  | 10.1<br>(9.5, 10.7)  | 9.9<br>(9.4, 10.5)   | 9.7<br>(9.1, 10.2)   | 10.1<br>(9.5, 10.6)  | 9.5<br>(9.0, 10.1)   |
| 70–79 years                      | 14.0<br>(13.5, 14.5) | 13.3<br>(12.8, 13.7) | 13.3<br>(12.8, 13.8) | 13.9<br>(13.4, 14.4) | 13.6<br>(13.1, 14.1) | 13.2<br>(12.7, 13.7) |
| ≥80 years                        | 20.5<br>(20.0, 20.9) | 19.7<br>(19.3, 20.2) | 20.9<br>(20.4, 21.3) | 20.6<br>(20.1, 21.1) | 20.4<br>(20.0, 20.9) | 20.3<br>(19.8, 20.7) |

CI, confidence interval.

**Table S3. Annual incidence and case-fatality rates for hospitalizations due to pneumococcal pneumonia in Canada, 2004–2005 to 2009–2010 by age group**

[illegible]

|             | <b>2004–2005</b>     | <b>2005–2006</b>     | <b>2006–2007</b>     | <b>2007–2008</b>     | <b>2008–2009</b>     | <b>2009–2010</b>     |
|-------------|----------------------|----------------------|----------------------|----------------------|----------------------|----------------------|
| 0–4 years   | 0.0                  | 1.1<br>(0.1, 7.1)    | 0.0                  | 0.0                  | 0.0                  | 0.8<br>(0.1, 5.3)    |
| 5–9 years   | 0.0                  | 0.0                  | 0.0                  | 0.0                  | 0.0                  | 0.0                  |
| 10–14 years | 0.0                  | 0.0                  | 0.0                  | 5.9<br>(0.8, 32.0)   | 25.0<br>(3.4, 76.2)  | 0.0                  |
| 15–19 years | 0.0                  | 0.0                  | 0.0                  | 0.0                  | 0.0                  | 0.0                  |
| 20–29 years | 3.9<br>(1.0, 14.4)   | 2.0<br>(0.3, 12.6)   | 0.0                  | 0.0                  | 2.1<br>(0.3, 13.6)   | 1.7<br>(0.2, 11.2)   |
| 30–39 years | 5.4<br>(2.4, 11.5)   | 3.4<br>(1.3, 8.6)    | 1.6<br>(0.4, 6.1)    | 2.4<br>(0.8, 7.1)    | 1.0<br>(0.1, 7.0)    | 3.7<br>(1.4, 9.4)    |
| 40–49 years | 4.4<br>(2.2, 8.6)    | 2.8<br>(1.2, 6.6)    | 2.9<br>(1.4, 5.9)    | 1.4<br>(0.5, 4.4)    | 3.0<br>(1.3, 7.0)    | 4.3<br>(2.2, 8.4)    |
| 50–59 years | 7.9<br>(5.1, 12.2)   | 9.0<br>(5.7, 13.8)   | 4.5<br>(2.4, 8.4)    | 5.4<br>(3.1, 9.2)    | 5.3<br>(2.9, 9.7)    | 3.6<br>(1.7, 7.4)    |
| 60–69 years | 6.3<br>(3.9, 9.9)    | 5.1<br>(2.9, 9.0)    | 4.6<br>(2.5, 8.3)    | 6.3<br>(3.8, 10.1)   | 6.7<br>(4.1, 10.8)   | 7.8<br>(4.9, 12.2)   |
| 70–79 years | 14.3<br>(10.7, 19.0) | 10.2<br>(6.7, 15.1)  | 12.1<br>(8.4, 17.2)  | 10.0<br>(6.6, 14.7)  | 7.7<br>(4.7, 12.4)   | 8.7<br>(5.5, 13.6)   |
| ≥80 years   | 16.9<br>(12.8, 22.0) | 18.3<br>(13.4, 24.5) | 17.9<br>(13.0, 24.2) | 19.1<br>(13.7, 26.0) | 21.1<br>(15.5, 28.0) | 17.6<br>(12.5, 24.2) |

CI, confidence interval.
